# Supplementary material for: Inverse modeling of GOSAT-retrieved ratios of total column CH 4 and CO 2 for 2009 and 2010
Source: Copernicus journal article supplement (doi:10.5194/acp-16-5043-2016), 2016-04-22
Supplement: Supplementary file 1 [file acp-16-5043-2016-supplement.pdf]

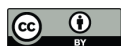

*Supplement of*

## **Inverse modeling of GOSAT-retrieved ratios of total column CH<sub>4</sub> and CO<sub>2</sub> for 2009 and 2010**

**Sudhanshu Pandey et al.**

*Correspondence to:* Sudhanshu Pandey (s.pandey@uu.nl)

The copyright of individual parts of the supplement might differ from the CC-BY 3.0 licence.

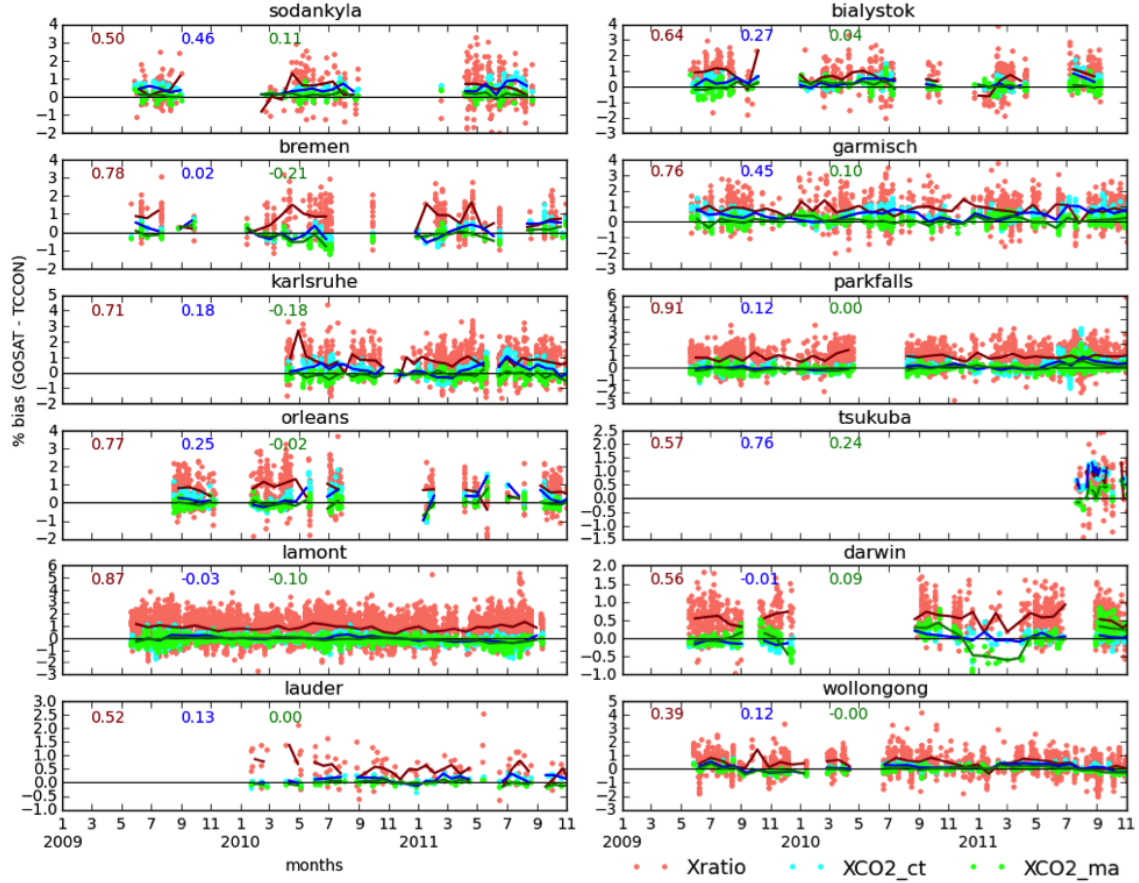

Figure 1: Percentage error relative to TCCON measurements in the terms used to calculate  $\text{XCH}_4^{\text{proxy}}$  ( Xratio: red,  $\text{XCO}_2^{\text{ma}}$  : green,  $\text{XCO}_2^{\text{ct}}$ : blue). The lines in darker color represent a running average of the corresponding points in lighter color. At the top left of each panel we show the mean of these errors. Note that the values shown in table 1 of main article are different from mean bias values shown in this table as they are weighted with the errors in GOSAT and TCCON measurements.

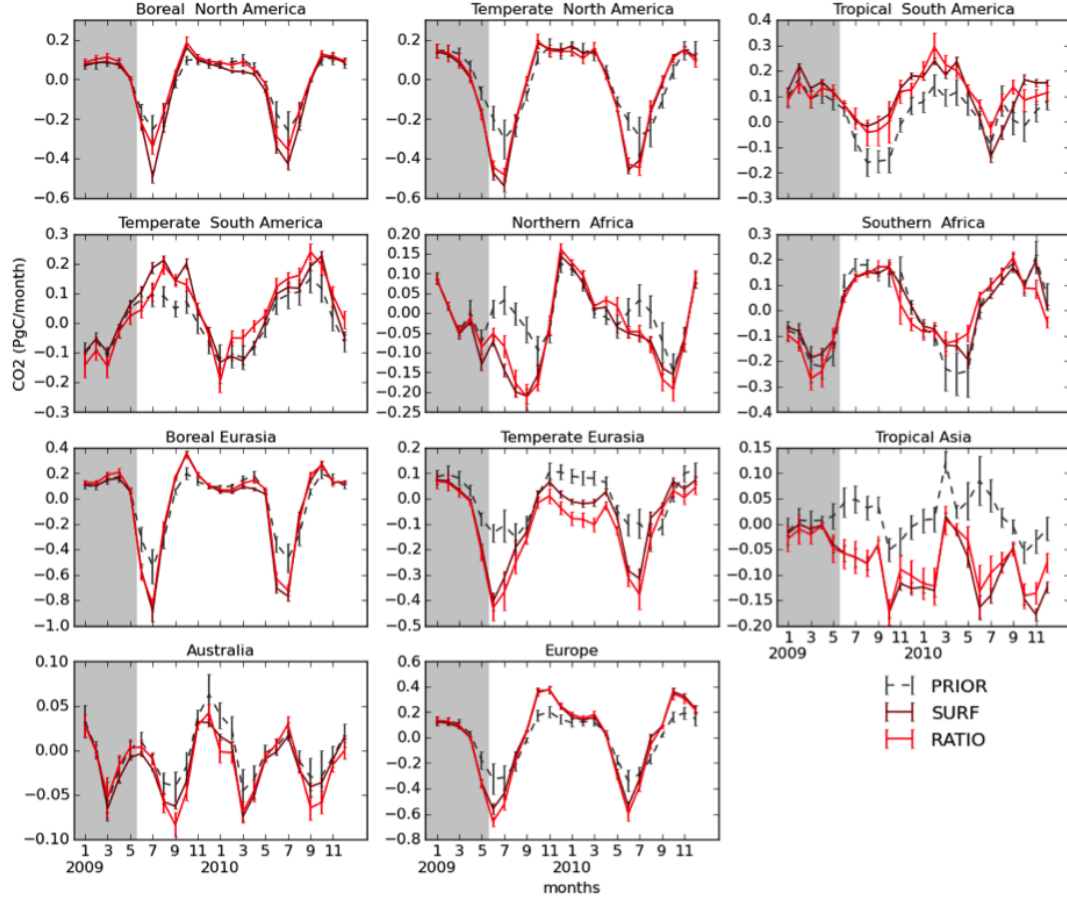

Figure 2: Net monthly fluxes of  $\text{CO}_2$  (excluding fossil fuel emissions) integrated over TRANSCom regions. The vertical lines represent  $1\sigma$  uncertainty of the monthly fluxes estimated with the Monte-Carlo method. The gray regions in each plot represent the time period for which no measurements are assimilated.

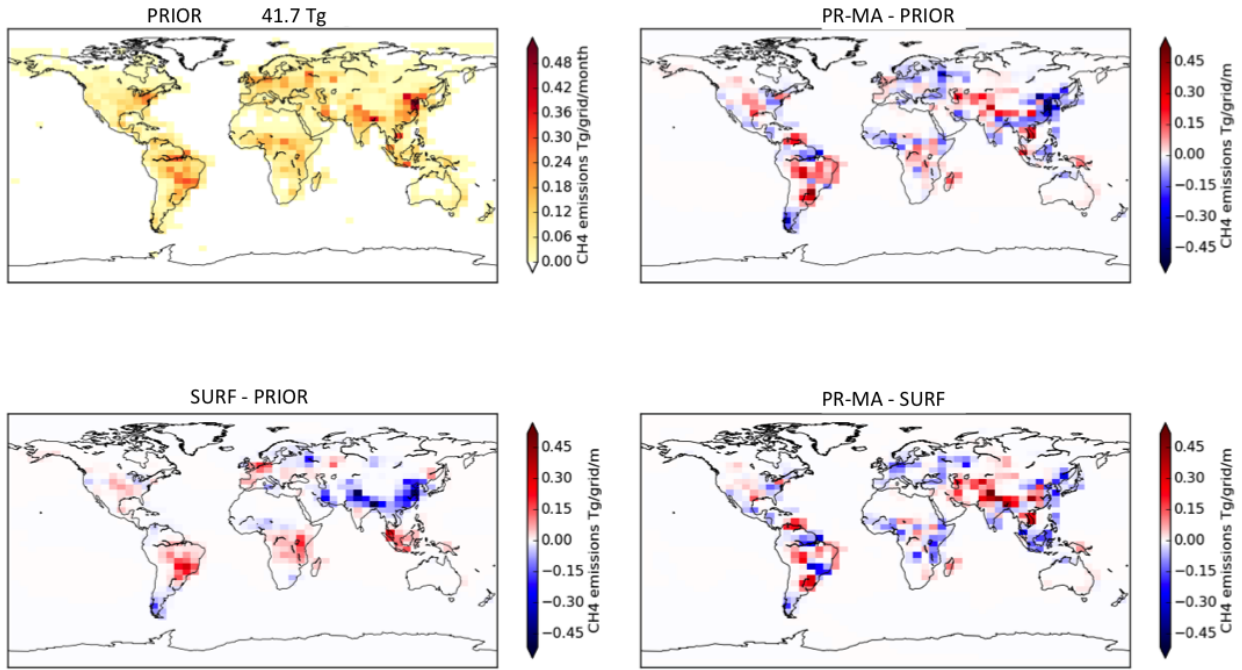

Figure 3: CH<sub>4</sub> fluxes in January 2010.

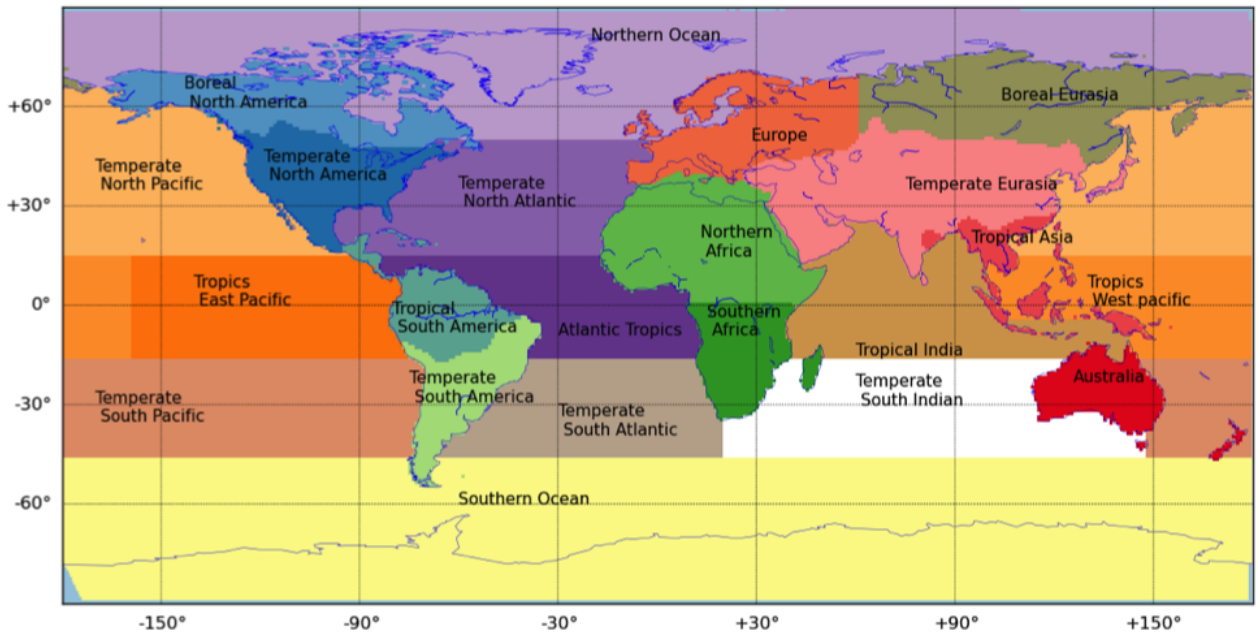

Figure 4: TRANSCOM region map [Gurney *et al.*, 2002] used for integrating the surface fluxes.

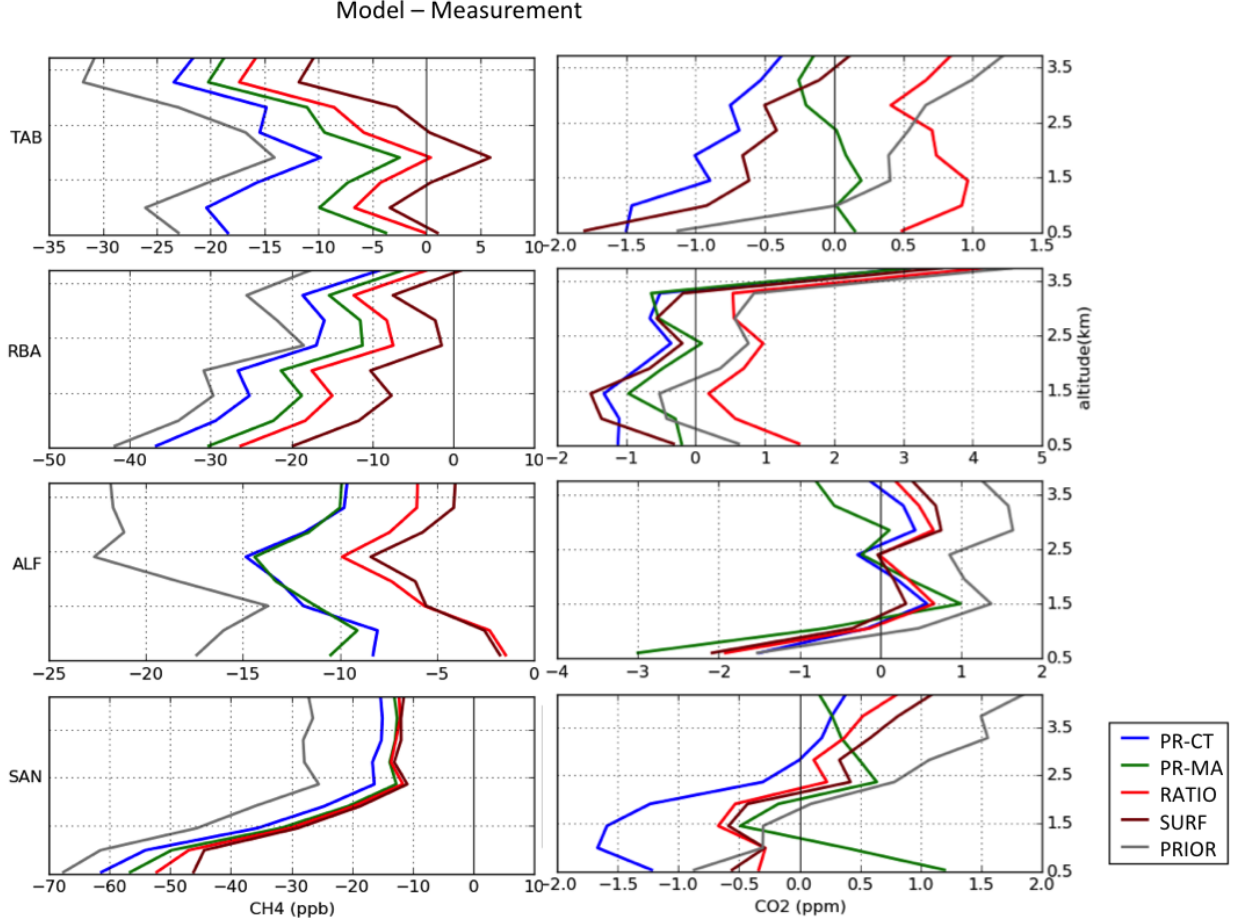

Figure 5: Mean modeled - measured profiles at the four sites of the AMAZONICA campaign. We grouped the measurements in 10 vertical bins and the plotted values represent the mean of each bin. All models have difficulties in reproducing the large  $\text{CH}_4$  mixing ratios measured at Santarem (SAN) below 2 km altitude, likely due to local variations that cannot be reproduced by the coarse grid model.

Table 1: Statistics of the aircraft validation.

| Tracer          | Campaign  | Project       | $\mu$  | $\sigma$ | $RMSD$ | $\kappa$ |
|-----------------|-----------|---------------|--------|----------|--------|----------|
| CH <sub>4</sub> | AMAZONICA | PRIOR         | -32.02 | 35.33    | 47.68  | 16.77    |
|                 |           | SURF          | -14.06 | 30.15    | 33.27  | 3.48     |
|                 |           | RATIO         | -17.18 | 28.81    | 33.55  | 4.35     |
|                 |           | PR-CT         | -24.11 | 28.64    | 37.44  | 8.43     |
|                 |           | PR-LM         | -20.3  | 28.74    | 35.19  | 5.4      |
|                 | HIPPO     | PRIOR         | 13.49  | 33.11    | 35.75  | 6.14     |
|                 |           | SURF          | 5.56   | 27.79    | 28.35  | 1.67     |
|                 |           | RATIO         | 6.68   | 27.95    | 28.74  | 1.79     |
|                 |           | PR-CT         | 6.03   | 28.17    | 28.8   | 1.94     |
|                 |           | PR-LM         | 6.95   | 28.02    | 28.87  | 1.83     |
|                 | CONTRAIL  | PRIOR         | 13.99  | 21.59    | 25.73  | 6.99     |
|                 |           | SURF          | 0.92   | 19.66    | 19.69  | 5.33     |
|                 |           | RATIO         | 2.99   | 19.07    | 19.31  | 5.47     |
|                 |           | PR-CT         | 4.43   | 19.16    | 19.67  | 4.56     |
|                 |           | PR-LM         | 3.87   | 18.73    | 19.12  | 4.71     |
| CO <sub>2</sub> | AMAZONICA | PRIOR         | 0.46   | 3.35     | 3.38   |          |
|                 |           | SURF          | -0.23  | 3.3      | 3.31   |          |
|                 |           | RATIO         | 0.27   | 3.22     | 3.23   |          |
|                 |           | CarbonTracker | -0.67  | 3.11     | 3.18   |          |
|                 |           | LMDZ          | -0.03  | 3.13     | 3.13   |          |
|                 | HIPPO     | PRIOR         | 1.55   | 1.44     | 2.12   |          |
|                 |           | SURF          | -0.09  | 1.26     | 1.26   |          |
|                 |           | RATIO         | -0.12  | 1.28     | 1.29   |          |
|                 |           | CarbonTracker | -0.17  | 1.08     | 1.09   |          |
|                 |           | LMDZ          | -0.16  | 1.06     | 1.08   |          |
|                 | CONTRAIL  | PRIOR         | 2.23   | 1.69     | 2.8    |          |
|                 |           | SURF          | -0.41  | 1.6      | 1.65   |          |
|                 |           | RATIO         | -0.43  | 1.59     | 1.64   |          |
|                 |           | CarbonTracker | 0.11   | 1.41     | 1.41   |          |
|                 |           | LMDZ          | -0.2   | 1.45     | 1.46   |          |

## References

Gurney, K., et al., Towards robust regional estimates of CO<sub>2</sub> sources and sinks using atmospheric transport models, *Nature*, *415*, 626– 630, doi:doi:10.1038/415626a,2002., 2002.
